# Supplementary material for: M-Batches to Simulate Luminal and Mucosal Human Gut Microbial Ecosystems: A Case Study of the Effects of Coffee and Green Tea
Source: MDPI journal article supplement (doi:10.3390/microorganisms12020236), 2024-01-23

# Supplementary Material

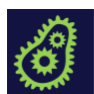

*microorganisms*

*Article*

## M-Batches to Simulate Luminal and Mucosal Human Gut Microbial Ecosystems: A Case Study of the Effects of Coffee and Green Tea

Elizabeth Goya-Jorge <sup>1,2,†</sup>, Irma Gonza <sup>1,†</sup>, Caroline Douny <sup>3</sup>, Marie-Louise Scippo <sup>3</sup> and Véronique Delcenserie <sup>1,\*</sup>

<sup>1</sup> Laboratory of Food Quality Management, Department of Food Sciences, FARA-H-Veterinary Public Health, University of Liège, B43b, 4000 Liège, Belgium; egoya@uliege.be (E.G.-J.); iegonza@uliege.be (I.G.)

<sup>2</sup> Intestinal Regenerative Medicine Laboratory, Department of Clinical Sciences, College of Veterinary Medicine, North Carolina State University, Raleigh, NC 27606, USA

<sup>3</sup> Laboratory of Food Analysis, Department of Food Sciences, FARA-H-Veterinary Public Health, University of Liège, B43b, 4000 Liège, Belgium; cdouny@uliege.be (C.D.); mlscippo@uliege.be (M.-L.S.)

\* Correspondence: veronique.delcenserie@uliege.be; Tel.: +32-4366-5124

† These authors contributed equally to this work.

**Supplementary Table S1.** Target bacteria population measured by qPCR, protocols and annealing temperatures validated.

| Target                               | Tann <sup>a</sup><br>(°C) | [nM] <sup>b</sup> | Validated Protocol | References<br>(Sequences) |
|--------------------------------------|---------------------------|-------------------|--------------------|---------------------------|
| Total bacteria                       | 61.5                      | 500               |                    | [1]                       |
| Cluster XIVa                         | 61.5                      | 500               |                    | [2]                       |
| Cluster IV                           | 61.5                      | 500               |                    | [3]                       |
| <i>Roseburia</i> spp.                | 61.5                      | 500               |                    | [4]                       |
| <i>Bacteroides-Prevotella</i> spp.   | 54.0                      | 500               |                    | [5]                       |
| <i>Bifidobacterium</i> spp.          | 54.0                      | 500               |                    | [6]                       |
| Lactobacilli                         | 58.0                      | 300               |                    | [7]                       |
| <i>Veillonella</i> spp.              | 58.0                      | 500               |                    | [4,8]                     |
| <i>Akkermansia muciniphila</i>       | 54.0                      | 500               |                    | [9]                       |
| <i>Faecalibacterium prausnitzii</i>  | 54.0                      | 500               |                    |                           |
| <i>Phascolarctobacterium faecium</i> | 58.0                      | 150               |                    |                           |
| <i>Coprococcus</i> spp.              | 63.0                      | 800               |                    | [10]                      |

<sup>a</sup> Tann: Temperature of annealing, <sup>b</sup> Concentration of primer oligosaccharides (forward and reverse) expressed in nM.

## REFERENCES

- Bacchetti De Gregoris, T.; Aldred, N.; Clare, A.S.; Burgess, J.G. Improvement of Phylum- and Class-Specific Primers for Real-Time PCR Quantification of Bacterial Taxa. *J Microbiol Methods* **2011**, *86*, 351–356, doi:10.1016/j.mimet.2011.06.010.
- Matsuki, T.; Watanabe, K.; Fujimoto, J.; Takada, T.; Tanaka, R. Use of 16S rRNA Gene-Targeted Group-Specific Primers for Real-Time PCR Analysis of Predominant Bacteria in Human Feces. *Appl Environ Microbiol* **2004**, *70*, 7220–7228, doi:10.1128/AEM.70.12.7220-7228.2004.
- Ramirez-Farias, C.; Slezak, K.; Fuller, Z.; Duncan, A.; Holtrop, G.; Louis, P. Effect of Inulin on the Human Gut Microbiota: Stimulation of *Bifidobacterium Adolescentis* and *Faecalibacterium Prausnitzii*. *Br J Nutr* **2009**, *101*, 541–550, doi:10.1017/S0007114508019880.
- Morel, F.B.; Oozeer, R.; Piloquet, H.; Moyon, T.; Pagniez, A.; Knol, J.; Darmaun, D.; Michel, C. Prewaning Modulation of Intestinal Microbiota by Oligosaccharides or Amoxicillin Can Contribute to Programming of Adult Microbiota in Rats. *Nutrition* **2015**, *31*, 515–522, doi:10.1016/j.nut.2014.09.011.
- Amit-Romach, E.; Sklan, D.; Uni, Z. Microflora Ecology of the Chicken Intestine Using 16S Ribosomal DNA Primers. *Poult Sci* **2004**, *83*, 1093–1098, doi:10.1093/ps/83.7.1093.
- Rinttilä, T.; Kassinen, A.; Malinen, E.; Krogus, L.; Palva, A. Development of an Extensive Set of 16S rDNA-Targeted Primers for Quantification of Pathogenic and Indigenous Bacteria in Faecal Samples by Real-Time PCR. *J Appl Microbiol* **2004**, *97*, 1166–1177, doi:10.1111/j.1365-2672.2004.02409.x.
- Everard, A.; Belzer, C.; Geurts, L.; Ouwerkerk, J.P.; Druart, C.; Bindels, L.B.; Guiot, Y.; Derrien, M.; Muccioli, G.G.; Delzenne, N.M.; et al. Cross-Talk between *Akkermansia Muciniphila* and Intestinal Epithelium Controls Diet-Induced Obesity. *Proceedings of the National Academy of Sciences* **2013**, *110*, 9066–9071, doi:10.1073/pnas.1219451110.
- Wang, R.F.; Cao, W.W.; Cerniglia, C.E. PCR Detection and Quantitation of Predominant Anaerobic Bacteria in Human and Animal Fecal Samples. *Appl Environ Microbiol* **1996**, *62*, 1242–1247, doi:10.1128/aem.62.4.1242-1247.1996.
- Wu, F.; Guo, X.; Zhang, J.; Zhang, M.; Ou, Z.; Peng, Y. *Phascolarctobacterium Faecium* Abundant Colonization in Human Gastrointestinal Tract. *Exp Ther Med* **2017**, *14*, 3122–3126, doi:10.3892/etm.2017.4878.
- Lyra, A.; Krogus-Kurikka, L.; Nikkilä, J.; Malinen, E.; Kajander, K.; Kurikka, K.; Korpela, R.; Palva, A. Effect of a Multispecies Probiotic Supplement on Quantity of Irritable Bowel Syndrome-Related Intestinal Microbial Phylotypes. *BMC Gastroenterol* **2010**, *10*, 110, doi:10.1186/1471-230X-10-110.

**Supplementary Table S2.** Phylogenetic analysis using 16S rRNA sequencing for the Inoculum A (pool of feces) used to perform the green tea M-batches experiment

| Kingdom  | Phylum         | Class            | Order                      | Family                        | Genus                                | OTUs Pool of feces |
|----------|----------------|------------------|----------------------------|-------------------------------|--------------------------------------|--------------------|
| Bacteria | Actinomycetota | Actinomycetes    | Bifidobacteriales          | Bifidobacteriaceae            | <i>Bifidobacterium</i>               | 8                  |
| Bacteria | Actinomycetota | Coriobacteriia   | Coriobacteriales           | Coriobacteriales_fa           | <i>Coriobacteriales_fa_ge</i>        | 2                  |
| Bacteria | Actinomycetota | Coriobacteriia   | Coriobacteriales           | Coriobacteriales_fa           | <i>Coriobacteriales_ge_ge</i>        | 1                  |
| Bacteria | Actinomycetota | Coriobacteriia   | Eggerthellales             | Eggerthellaceae               | <i>Eggerthella</i>                   | 1                  |
| Bacteria | Bacillota      | Erysipelotrichia | Erysipelotrichales         | Coprobacillaceae              | <i>Catenibacterium</i>               | 8                  |
| Bacteria | Bacillota      | Erysipelotrichia | Erysipelotrichales         | Coprobacillaceae              | <i>Erysipelatoclostridiaceae_ge</i>  | 6                  |
| Bacteria | Bacillota      | Erysipelotrichia | Erysipelotrichales         | Coprobacillaceae              | <i>Thomasclavelia</i>                | 1                  |
| Bacteria | Bacillota      | Erysipelotrichia | Erysipelotrichales         | Coprobacillaceae              | <i>Erysipelotrichaceae_UCG-003</i>   | 3                  |
| Bacteria | Bacillota      | Erysipelotrichia | Erysipelotrichales         | Erysipelotrichaceae           | <i>Erysipelotrichaceae_ge</i>        | 7                  |
| Bacteria | Bacillota      | Erysipelotrichia | Erysipelotrichales         | Erysipelotrichaceae           | <i>Holdemanella</i>                  | 44                 |
| Bacteria | Bacillota      | Erysipelotrichia | Erysipelotrichales         | Erysipelotrichaceae           | <i>Holdemania</i>                    | 2                  |
| Bacteria | Bacillota      | Erysipelotrichia | Erysipelotrichales         | Erysipelotrichaceae           | <i>Merdibacter</i>                   | 2                  |
| Bacteria | Bacillota      | Bacilli          | Lactobacillales            | Enterococcaceae               | <i>Enterococcus</i>                  | 1                  |
| Bacteria | Bacillota      | Bacilli          | Lactobacillales            | Lactobacillaceae              | <i>Pediococcus</i>                   | 1                  |
| Bacteria | Bacillota      | Bacilli          | Lactobacillales            | Streptococcaceae              | <i>Lactococcus</i>                   | 2                  |
| Bacteria | Bacillota      | Bacilli          | Lactobacillales            | Streptococcaceae              | <i>Streptococcus</i>                 | 12                 |
| Bacteria | Bacillota      | Bacilli          | RF39                       | RF39_fa                       | RF39_ge                              | 8                  |
| Bacteria | Bacillota      | Clostridia       | Eubacteriales              | Christensenellaceae           | <i>Christensenellaceae_ge</i>        | 9                  |
| Bacteria | Bacillota      | Clostridia       | Eubacteriales              | Christensenellaceae           | <i>Christensenellaceae_R-7_group</i> | 118                |
| Bacteria | Bacillota      | Clostridia       | Clostridia_or              | Clostridia_fa                 | <i>Clostridia_ge</i>                 | 23                 |
| Bacteria | Bacillota      | Clostridia       | Clostridia_UCG-014         | Clostridia_UCG-014_fa         | <i>Clostridia_UCG-014_ge</i>         | 55                 |
| Bacteria | Bacillota      | Clostridia       | Clostridia_vadinBB60_group | Clostridia_vadinBB60_group_fa | <i>Clostridia_vadinBB60_group_ge</i> | 37                 |
| Bacteria | Bacillota      | Clostridia       | Eubacteriales              | Clostridiaceae                | <i>Clostridium_sensu_stricto_1</i>   | 7                  |
| Bacteria | Bacillota      | Clostridia       | Eubacteriales              | Defluviitaleaceae             | <i>Defluviitaleaceae_UCG-011</i>     | 1                  |
| Bacteria | Bacillota      | Clostridia       | Eubacteriales              | Lachnospiraceae               | <i>Agathobacter</i>                  | 112                |
| Bacteria | Bacillota      | Clostridia       | Eubacteriales              | Lachnospiraceae               | <i>Anaerostipes</i>                  | 8                  |
| Bacteria | Bacillota      | Clostridia       | Eubacteriales              | Lachnospiraceae               | <i>Blautia</i>                       | 84                 |
| Bacteria | Bacillota      | Clostridia       | Eubacteriales              | Lachnospiraceae               | CAG-56                               | 5                  |
| Bacteria | Bacillota      | Clostridia       | Eubacteriales              | Lachnospiraceae               | <i>Coprococcus</i>                   | 544                |

|          |           |            |               |                    |                                      |     |
|----------|-----------|------------|---------------|--------------------|--------------------------------------|-----|
| Bacteria | Bacillota | Clostridia | Eubacteriales | Lachnospiraceae    | <i>Cuneatibacter</i>                 | 1   |
| Bacteria | Bacillota | Clostridia | Eubacteriales | Lachnospiraceae    | <i>Dorea</i>                         | 90  |
| Bacteria | Bacillota | Clostridia | Eubacteriales | Lachnospiraceae    | <i>Fusicatenibacter</i>              | 48  |
| Bacteria | Bacillota | Clostridia | Eubacteriales | Lachnospiraceae    | <i>Lachnoclostridium</i>             | 92  |
| Bacteria | Bacillota | Clostridia | Eubacteriales | Lachnospiraceae    | <i>Lachnospira</i>                   | 119 |
| Bacteria | Bacillota | Clostridia | Eubacteriales | Lachnospiraceae    | <i>Lachnospiraceae_FCS020_group</i>  | 2   |
| Bacteria | Bacillota | Clostridia | Eubacteriales | Lachnospiraceae    | <i>Lachnospiraceae_ge</i>            | 935 |
| Bacteria | Bacillota | Clostridia | Eubacteriales | Lachnospiraceae    | <i>Lachnospiraceae_ND3007_group</i>  | 2   |
| Bacteria | Bacillota | Clostridia | Eubacteriales | Lachnospiraceae    | <i>Lachnospiraceae_NK4A136_group</i> | 368 |
| Bacteria | Bacillota | Clostridia | Eubacteriales | Lachnospiraceae    | <i>Lachnospiraceae_NK4B4_group</i>   | 1   |
| Bacteria | Bacillota | Clostridia | Eubacteriales | Lachnospiraceae    | <i>Lachnospiraceae_UCG-001</i>       | 13  |
| Bacteria | Bacillota | Clostridia | Eubacteriales | Lachnospiraceae    | <i>Lachnospiraceae_UCG-004</i>       | 53  |
| Bacteria | Bacillota | Clostridia | Eubacteriales | Lachnospiraceae    | <i>Lachnospiraceae_UCG-010</i>       | 3   |
| Bacteria | Bacillota | Clostridia | Eubacteriales | Lachnospiraceae    | <i>Marvinbryantia</i>                | 2   |
| Bacteria | Bacillota | Clostridia | Eubacteriales | Lachnospiraceae    | <i>Roseburia</i>                     | 48  |
| Bacteria | Bacillota | Clostridia | Eubacteriales | Lachnospiraceae    | <i>Sellimonas</i>                    | 1   |
| Bacteria | Bacillota | Clostridia | Eubacteriales | Lachnospiraceae    | <i>Lachnospirales_ge</i>             | 1   |
| Bacteria | Bacillota | Clostridia | Eubacteriales | Oscillospiraceae   | <i>Monoglobus</i>                    | 38  |
| Bacteria | Bacillota | Clostridia | Eubacteriales | Clostridiaceae     | <i>Butyricicoccaceae_ge</i>          | 1   |
| Bacteria | Bacillota | Clostridia | Eubacteriales | Clostridiaceae     | <i>Butyricicoccus</i>                | 29  |
| Bacteria | Bacillota | Clostridia | Eubacteriales | Oscillospiraceae   | <i>Acetanaerobacterium</i>           | 1   |
| Bacteria | Bacillota | Clostridia | Eubacteriales | Oscillospiraceae   | <i>Colidextribacter</i>              | 22  |
| Bacteria | Bacillota | Clostridia | Eubacteriales | Oscillospiraceae   | <i>Flavonifractor</i>                | 10  |
| Bacteria | Bacillota | Clostridia | Eubacteriales | Oscillospiraceae   | <i>Intestinimonas</i>                | 2   |
| Bacteria | Bacillota | Clostridia | Eubacteriales | Oscillospiraceae   | NK4A214_group                        | 89  |
| Bacteria | Bacillota | Clostridia | Eubacteriales | Oscillospiraceae   | <i>Oscillibacter</i>                 | 22  |
| Bacteria | Bacillota | Clostridia | Eubacteriales | Oscillospiraceae   | <i>Oscillospira</i>                  | 1   |
| Bacteria | Bacillota | Clostridia | Eubacteriales | Oscillospiraceae   | <i>Oscillospiraceae_ge</i>           | 30  |
| Bacteria | Bacillota | Clostridia | Eubacteriales | Oscillospiraceae   | <i>Pseudoflavonifractor</i>          | 1   |
| Bacteria | Bacillota | Clostridia | Eubacteriales | Oscillospiraceae   | UCG-002                              | 269 |
| Bacteria | Bacillota | Clostridia | Eubacteriales | Oscillospiraceae   | UCG-003                              | 48  |
| Bacteria | Bacillota | Clostridia | Eubacteriales | Oscillospiraceae   | UCG-005                              | 149 |
| Bacteria | Bacillota | Clostridia | Eubacteriales | Oscillospiraceae   | V9D2013_group                        | 1   |
| Bacteria | Bacillota | Clostridia | Eubacteriales | Oscillospirales_fa | <i>Oscillospirales_ge</i>            | 177 |
| Bacteria | Bacillota | Clostridia | Eubacteriales | Oscillospiraceae   | <i>Anaerofilum</i>                   | 2   |

|          |              |               |                      |                       |                                                  |     |
|----------|--------------|---------------|----------------------|-----------------------|--------------------------------------------------|-----|
| Bacteria | Bacillota    | Clostridia    | Eubacteriales        | Oscillospiraceae      | CAG-352                                          | 4   |
| Bacteria | Bacillota    | Clostridia    | Eubacteriales        | Oscillospiraceae      | <i>Candidatus_Soleaferrea</i>                    | 1   |
| Bacteria | Bacillota    | Clostridia    | Eubacteriales        | Oscillospiraceae      | DTU089                                           | 4   |
| Bacteria | Bacillota    | Clostridia    | Eubacteriales        | Oscillospiraceae      | <i>Faecalibacterium</i>                          | 838 |
| Bacteria | Bacillota    | Clostridia    | Eubacteriales        | Oscillospiraceae      | <i>Fournierella</i>                              | 14  |
| Bacteria | Bacillota    | Clostridia    | Eubacteriales        | Oscillospiraceae      | <i>Negativibacillus</i>                          | 4   |
| Bacteria | Bacillota    | Clostridia    | Eubacteriales        | Oscillospiraceae      | <i>Phoceia</i>                                   | 2   |
| Bacteria | Bacillota    | Clostridia    | Eubacteriales        | Oscillospiraceae      | <i>Ruminococcaceae_ge</i>                        | 162 |
| Bacteria | Bacillota    | Clostridia    | Eubacteriales        | Oscillospiraceae      | <i>Ruminococcus</i>                              | 321 |
| Bacteria | Bacillota    | Clostridia    | Eubacteriales        | Oscillospiraceae      | <i>Subdoligranulum</i>                           | 599 |
| Bacteria | Bacillota    | Clostridia    | Eubacteriales        | Oscillospiraceae      | UBA1819                                          | 10  |
| Bacteria | Bacillota    | Clostridia    | Eubacteriales        | UCG-010               | UCG-010_ge                                       | 83  |
| Bacteria | Bacillota    | Clostridia    | Peptostreptococcales | Anaerovoracaceae      | <i>Anaerovoracaceae_Family_XIII_AD3011_group</i> | 13  |
| Bacteria | Bacillota    | Clostridia    | Peptostreptococcales | Anaerovoracaceae      | <i>Anaerovoracaceae_Family_XIII_UCG-001</i>      | 11  |
| Bacteria | Bacillota    | Clostridia    | Peptostreptococcales | Anaerovoracaceae      | <i>Anaerovoracaceae_ge</i>                       | 5   |
| Bacteria | Bacillota    | Tissierellia  | Tissierellales       | Peptoniphilaceae      | <i>Peptoniphilus</i>                             | 1   |
| Bacteria | Bacillota    | Clostridia    | Eubacteriales        | Peptostreptococcaceae | <i>Intestinibacter</i>                           | 5   |
| Bacteria | Bacillota    | Clostridia    | Eubacteriales        | Peptostreptococcaceae | <i>Romboutsia</i>                                | 10  |
| Bacteria | Bacillota    | Clostridia    | Eubacteriales        | Peptostreptococcaceae | <i>Terrisporobacter</i>                          | 2   |
| Bacteria | Bacillota    | Negativicutes | Acidaminococcales    | Acidaminococcaceae    | <i>Phascolarctobacterium</i>                     | 125 |
| Bacteria | Bacillota    | Negativicutes | Selenomonadales      | Selenomonadaceae      | <i>Megamonas</i>                                 | 1   |
| Bacteria | Bacillota    | Negativicutes | Selenomonadales      | Selenomonadaceae      | <i>Mitsuokella</i>                               | 3   |
| Bacteria | Bacillota    | Negativicutes | Veillonellales       | Veillonellaceae       | <i>Dialister</i>                                 | 311 |
| Bacteria | Bacillota    | Negativicutes | Veillonellales       | Veillonellaceae       | <i>Megasphaera</i>                               | 16  |
| Bacteria | Bacillota    | Negativicutes | Veillonellales       | Veillonellaceae       | <i>Veillonella</i>                               | 2   |
| Bacteria | Bacillota    | Negativicutes | Veillonellales       | Veillonellaceae       | <i>Veillonellaceae_ge</i>                        | 4   |
| Bacteria | Bacteria_ph  | Bacteria_cl   | Bacteria_or          | Bacteria_fa           | <i>Bacteria_ge</i>                               | 7   |
| Bacteria | Bacteroidota | Bacteroidia   | Bacteroidales        | Bacteroidaceae        | <i>Bacteroides</i>                               | 753 |
| Bacteria | Bacteroidota | Bacteroidia   | Bacteroidales        | Bacteroidales_fa      | <i>Bacteroidales_ge</i>                          | 42  |
| Bacteria | Bacteroidota | Bacteroidia   | Bacteroidales        | Barnesiellaceae       | <i>Barnesiella</i>                               | 109 |
| Bacteria | Bacteroidota | Bacteroidia   | Bacteroidales        | Barnesiellaceae       | <i>Copro bacter</i>                              | 4   |
| Bacteria | Bacteroidota | Bacteroidia   | Bacteroidales        | Odoribacteraceae      | <i>Butyricimonas</i>                             | 25  |
| Bacteria | Bacteroidota | Bacteroidia   | Bacteroidales        | Odoribacteraceae      | <i>Odoribacter</i>                               | 48  |

|          |                                   |                               |                                   |                                    |                                    |      |
|----------|-----------------------------------|-------------------------------|-----------------------------------|------------------------------------|------------------------------------|------|
| Bacteria | Bacteroidota                      | Bacteroidia                   | Bacteroidales                     | Muribaculaceae                     | CAG-873                            | 3    |
| Bacteria | Bacteroidota                      | Bacteroidia                   | Bacteroidales                     | Prevotellaceae                     | <i>Paraprevotella</i>              | 14   |
| Bacteria | Bacteroidota                      | Bacteroidia                   | Bacteroidales                     | Prevotellaceae                     | <i>Prevotella</i>                  | 1    |
| Bacteria | Bacteroidota                      | Bacteroidia                   | Bacteroidales                     | Prevotellaceae                     | <i>Prevotella_7</i>                | 3    |
| Bacteria | Bacteroidota                      | Bacteroidia                   | Bacteroidales                     | Prevotellaceae                     | <i>Prevotella_9</i>                | 1850 |
| Bacteria | Bacteroidota                      | Bacteroidia                   | Bacteroidales                     | Prevotellaceae                     | <i>Prevotellaceae_ge</i>           | 1    |
| Bacteria | Bacteroidota                      | Bacteroidia                   | Bacteroidales                     | Prevotellaceae                     | <i>Prevotellaceae_NK3B31_group</i> | 38   |
| Bacteria | Bacteroidota                      | Bacteroidia                   | Bacteroidales                     | Rikenellaceae                      | <i>Alistipes</i>                   | 227  |
| Bacteria | Bacteroidota                      | Bacteroidia                   | Bacteroidales                     | Rikenellaceae                      | <i>Rikenellaceae_RC9_gut_group</i> | 82   |
| Bacteria | Bacteroidota                      | Bacteroidia                   | Bacteroidales                     | Tannerellaceae                     | <i>Parabacteroides</i>             | 151  |
| Bacteria | Campylobacterota                  | Epsilonproteobacteria         | Campylobacterales                 | Helicobacteraceae                  | <i>Helicobacter</i>                | 2    |
| Bacteria | Cyanobacteriota<br>/Melainacteria | Candidatus<br>Melainabacteria | Candidatus<br>Gastranaerophilales | Candidatus<br>Gastranaerophilaceae | <i>Gastranaerophilales_ge</i>      | 1    |
| Bacteria | Lentisphaerota                    | Lentisphaeria                 | Victivallales                     | vadinBE97                          | <i>vadinBE97_ge</i>                | 4    |
| Bacteria | Lentisphaerota                    | Lentisphaeria                 | Victivallales                     | Victivallaceae                     | <i>Victivallaceae_ge</i>           | 2    |
| Bacteria | Lentisphaerota                    | Lentisphaeria                 | Victivallales                     | Victivallaceae                     | <i>Victivallis</i>                 | 26   |
| Bacteria | Mycoplasmata                      | Mollicutes                    | Acholeplasmatales                 | Acholeplasmataceae                 | <i>Anaeroplasmata</i>              | 16   |
| Bacteria | Mycoplasmata                      | Candidatus<br>Izimaplasma     | Candidatus Izemoplasmatales       | Candidatus Izemoplasmataceae       | <i>Candidatus Izemoplasmata</i>    | 1    |
| Bacteria | Pseudomonadota                    | Alphaproteobacteria           | Rhodospirillales                  | Rhodospirillales_fa                | <i>Rhodospirillales_fa_ge</i>      | 49   |
| Bacteria | Pseudomonadota                    | Betaproteobacteria            | Burkholderiales                   | Burkholderiales_fa                 | <i>Burkholderiales_ge</i>          | 2    |
| Bacteria | Pseudomonadota                    | Betaproteobacteria            | Burkholderiales                   | Oxalobacteraceae                   | <i>Oxalobacter</i>                 | 6    |
| Bacteria | Pseudomonadota                    | Betaproteobacteria            | Burkholderiales                   | Sutterellaceae                     | <i>Parasutterella</i>              | 45   |
| Bacteria | Pseudomonadota                    | Betaproteobacteria            | Burkholderiales                   | Sutterellaceae                     | <i>Sutterella</i>                  | 27   |
| Bacteria | Pseudomonadota                    | Gammaproteobacteria           | Enterobacteriales                 | Enterobacteriaceae                 | <i>Escherichia-Shigella</i>        | 4    |
| Bacteria | Pseudomonadota                    | Gammaproteobacteria           | Pasteurellales                    | Pasteurellaceae                    | <i>Haemophilus</i>                 | 2    |
| Bacteria | Pseudomonadota                    | Gammaproteobacteria           | Pasteurellales                    | Pasteurellaceae                    | <i>Pasteurellaceae_ge</i>          | 1    |
| Bacteria | Saccharimonadota                  | Saccharimonadia               | Saccharimonadales                 | Saccharimonadaceae                 | <i>Saccharimonadaceae_ge</i>       | 1    |
| Bacteria | Thermodesulfobacteriota           | Desulfovibrionia              | Desulfovibrionales                | Desulfovibrionaceae                | <i>Bilophila</i>                   | 9    |
| Bacteria | Thermodesulfobacteriota           | Desulfovibrionia              | Desulfovibrionales                | Desulfovibrionaceae                | <i>Desulfovibrio</i>               | 8    |
| Bacteria | Thermodesulfobacteriota           | Desulfovibrionia              | Desulfovibrionales                | Desulfovibrionaceae                | <i>Mailhella</i>                   | 2    |
| Bacteria | Verrucomicrobiota                 | Opitutae                      | Puniceicoccales                   | Coralimargaritaceae                | <i>Coralimargarita</i>             | 2    |
| Bacteria | Verrucomicrobiota                 | Verrucomicrobiae              | Verrucomicrobiales                | Akkermansiaceae                    | <i>Akkermansia</i>                 | 94   |

**Supplementary Table S3.** Phylogenetic analysis using 16S rRNA sequencing for the Inoculum B (individual donor) used to perform coffee M-batches experiment

| Kingdom  | Phylum         | Class            | Order                      | Family                          | Genus                                | OTUs Single donor |
|----------|----------------|------------------|----------------------------|---------------------------------|--------------------------------------|-------------------|
| Bacteria | Actinomycetota | Actinomycetes    | Bifidobacteriales          | Bifidobacteriaceae              | <i>Bifidobacterium</i>               | 2                 |
| Bacteria | Actinomycetota | Coriobacteriia   | Coriobacteriales           | Coriobacteriaceae               | <i>Collinsella</i>                   | 9                 |
| Bacteria | Actinomycetota | Coriobacteriia   | Coriobacteriales           | Coriobacteriales Incertae Sedis | <i>Coriobacteriales_ge</i>           | 6                 |
| Bacteria | Actinomycetota | Coriobacteriia   | Eggerthellales             | Eggerthellaceae                 | <i>Adlercreutzia</i>                 | 1                 |
| Bacteria | Bacillota      | Erysipelotrichia | Erysipelotrichales         | Coprobacillaceae                | <i>Catenibacterium</i>               | 4                 |
| Bacteria | Bacillota      | Erysipelotrichia | Erysipelotrichales         | Coprobacillaceae                | <i>Coprobacillus</i>                 | 22                |
| Bacteria | Bacillota      | Erysipelotrichia | Erysipelotrichales         | Coprobacillaceae                | <i>Thomasclavelia</i>                | 2                 |
| Bacteria | Bacillota      | Erysipelotrichia | Erysipelotrichales         | Erysipelotrichaceae             | <i>Erysipelotrichaceae_ge</i>        | 1                 |
| Bacteria | Bacillota      | Erysipelotrichia | Erysipelotrichales         | Erysipelotrichaceae             | <i>Holdemanella</i>                  | 20                |
| Bacteria | Bacillota      | Erysipelotrichia | Erysipelotrichales         | Erysipelotrichaceae             | <i>Solobacterium</i>                 | 1                 |
| Bacteria | Bacillota      | Bacilli          | Lactobacillales            | Carnobacteriaceae               | <i>Granulicatella</i>                | 1                 |
| Bacteria | Bacillota      | Bacilli          | Lactobacillales            | Streptococcaceae                | <i>Lactococcus</i>                   | 1                 |
| Bacteria | Bacillota      | Bacilli          | Lactobacillales            | Streptococcaceae                | <i>Streptococcus</i>                 | 42                |
| Bacteria | Bacillota      | Bacilli          | RF39                       | RF39_fa                         | RF39_ge                              | 11                |
| Bacteria | Bacillota      | Bacilli          | Bacillales                 | Gemellaceae                     | <i>Gemella</i>                       | 1                 |
| Bacteria | Bacillota      | Clostridia       | Eubacteriales              | Christensenellaceae             | <i>Christensenellaceae_ge</i>        | 2                 |
| Bacteria | Bacillota      | Clostridia       | Eubacteriales              | Christensenellaceae             | <i>Christensenellaceae_R-7_group</i> | 265               |
| Bacteria | Bacillota      | Clostridia       | Clostridia_or              | Clostridia_fa                   | <i>Clostridia_ge</i>                 | 13                |
| Bacteria | Bacillota      | Clostridia       | Clostridia_UCG-014         | Clostridia_UCG-014_fa           | <i>Clostridia_UCG-014_ge</i>         | 136               |
| Bacteria | Bacillota      | Clostridia       | Clostridia_vadinBB60_group | Clostridia_vadinBB60_group_fa   | <i>Clostridia_vadinBB60_group_ge</i> | 5                 |
| Bacteria | Bacillota      | Clostridia       | Eubacteriales              | Eubacteriales_fa                | <i>Eubacteriales_ge</i>              | 2                 |
| Bacteria | Bacillota      | Clostridia       | Eubacteriales              | Defluviitaleaceae               | <i>Defluviitaleaceae_UCG-011</i>     | 3                 |
| Bacteria | Bacillota      | Clostridia       | Eubacteriales              | Lachnospiraceae                 | <i>Anaerostipes</i>                  | 2                 |
| Bacteria | Bacillota      | Clostridia       | Eubacteriales              | Lachnospiraceae                 | <i>Blautia</i>                       | 22                |
| Bacteria | Bacillota      | Clostridia       | Eubacteriales              | Lachnospiraceae                 | <i>Catenibacillus</i>                | 1                 |
| Bacteria | Bacillota      | Clostridia       | Eubacteriales              | Lachnospiraceae                 | <i>Coproccoccus</i>                  | 199               |
| Bacteria | Bacillota      | Clostridia       | Eubacteriales              | Lachnospiraceae                 | <i>Dorea</i>                         | 3                 |

|          |           |            |               |                    |                                      |     |
|----------|-----------|------------|---------------|--------------------|--------------------------------------|-----|
| Bacteria | Bacillota | Clostridia | Eubacteriales | Lachnospiraceae    | <i>Eisenbergiella</i>                | 3   |
| Bacteria | Bacillota | Clostridia | Eubacteriales | Lachnospiraceae    | <i>Fusicatenibacter</i>              | 19  |
| Bacteria | Bacillota | Clostridia | Eubacteriales | Lachnospiraceae    | GCA-900066575                        | 4   |
| Bacteria | Bacillota | Clostridia | Eubacteriales | Lachnospiraceae    | GCA-900066755                        | 1   |
| Bacteria | Bacillota | Clostridia | Eubacteriales | Lachnospiraceae    | <i>Lachnoclostridium</i>             | 85  |
| Bacteria | Bacillota | Clostridia | Eubacteriales | Lachnospiraceae    | <i>Lachnospira</i>                   | 10  |
| Bacteria | Bacillota | Clostridia | Eubacteriales | Lachnospiraceae    | <i>Lachnospiraceae_ge</i>            | 137 |
| Bacteria | Bacillota | Clostridia | Eubacteriales | Lachnospiraceae    | <i>Lachnospiraceae_ND3007_group</i>  | 1   |
| Bacteria | Bacillota | Clostridia | Eubacteriales | Lachnospiraceae    | <i>Lachnospiraceae_NK4A136_group</i> | 72  |
| Bacteria | Bacillota | Clostridia | Eubacteriales | Lachnospiraceae    | <i>Lachnospiraceae_UCG-001</i>       | 6   |
| Bacteria | Bacillota | Clostridia | Eubacteriales | Lachnospiraceae    | <i>Lachnospiraceae_UCG-002</i>       | 1   |
| Bacteria | Bacillota | Clostridia | Eubacteriales | Lachnospiraceae    | <i>Lachnospiraceae_UCG-004</i>       | 10  |
| Bacteria | Bacillota | Clostridia | Eubacteriales | Lachnospiraceae    | <i>Lachnospiraceae_UCG-008</i>       | 1   |
| Bacteria | Bacillota | Clostridia | Eubacteriales | Lachnospiraceae    | <i>Lachnospiraceae_UCG-010</i>       | 1   |
| Bacteria | Bacillota | Clostridia | Eubacteriales | Lachnospiraceae    | <i>Marvinbryantia</i>                | 3   |
| Bacteria | Bacillota | Clostridia | Eubacteriales | Lachnospiraceae    | <i>Roseburia</i>                     | 21  |
| Bacteria | Bacillota | Clostridia | Eubacteriales | Lachnospiraceae    | UC5-1-2E3                            | 2   |
| Bacteria | Bacillota | Clostridia | Eubacteriales | Lachnospirales_fa  | <i>Lachnospirales_ge</i>             | 2   |
| Bacteria | Bacillota | Clostridia | Eubacteriales | Oscillospiraceae   | <i>Monoglobus</i>                    | 4   |
| Bacteria | Bacillota | Clostridia | Eubacteriales | Clostridiaceae     | <i>Butyricicoccus</i>                | 8   |
| Bacteria | Bacillota | Clostridia | Eubacteriales | Butyricoccaceae    | UCG-009                              | 1   |
| Bacteria | Bacillota | Clostridia | Eubacteriales | Oscillospiraceae   | <i>Colidextribacter</i>              | 18  |
| Bacteria | Bacillota | Clostridia | Eubacteriales | Oscillospiraceae   | <i>Flavonifractor</i>                | 52  |
| Bacteria | Bacillota | Clostridia | Eubacteriales | Oscillospiraceae   | <i>Intestinimonas</i>                | 4   |
| Bacteria | Bacillota | Clostridia | Eubacteriales | Oscillospiraceae   | NK4A214_group                        | 103 |
| Bacteria | Bacillota | Clostridia | Eubacteriales | Oscillospiraceae   | <i>Oscillibacter</i>                 | 10  |
| Bacteria | Bacillota | Clostridia | Eubacteriales | Oscillospiraceae   | <i>Oscillospira</i>                  | 3   |
| Bacteria | Bacillota | Clostridia | Eubacteriales | Oscillospiraceae   | <i>Oscillospiraceae_ge</i>           | 82  |
| Bacteria | Bacillota | Clostridia | Eubacteriales | Oscillospiraceae   | UCG-002                              | 272 |
| Bacteria | Bacillota | Clostridia | Eubacteriales | Oscillospiraceae   | UCG-003                              | 1   |
| Bacteria | Bacillota | Clostridia | Eubacteriales | Oscillospiraceae   | UCG-005                              | 144 |
| Bacteria | Bacillota | Clostridia | Eubacteriales | Oscillospiraceae   | UCG-007                              | 1   |
| Bacteria | Bacillota | Clostridia | Eubacteriales | Oscillospiraceae   | <i>Hydrogenoanaerobacterium</i>      | 2   |
| Bacteria | Bacillota | Clostridia | Eubacteriales | Oscillospirales_fa | <i>Oscillospirales_ge</i>            | 97  |
| Bacteria | Bacillota | Clostridia | Eubacteriales | Oscillospiraceae   | <i>Anaerofilum</i>                   | 3   |



|          |              |               |                      |                       |                                                   |     |
|----------|--------------|---------------|----------------------|-----------------------|---------------------------------------------------|-----|
| Bacteria | Bacillota    | Clostridia    | Eubacteriales        | Oscillospiraceae      | <i>Anaerotruncus</i>                              | 2   |
| Bacteria | Bacillota    | Clostridia    | Eubacteriales        | Oscillospiraceae      | <i>Angelakisella</i>                              | 1   |
| Bacteria | Bacillota    | Clostridia    | Eubacteriales        | Oscillospiraceae      | CAG-352                                           | 72  |
| Bacteria | Bacillota    | Clostridia    | Eubacteriales        | Oscillospiraceae      | DTU089                                            | 3   |
| Bacteria | Bacillota    | Clostridia    | Eubacteriales        | Oscillospiraceae      | <i>Faecalibacterium</i>                           | 405 |
| Bacteria | Bacillota    | Clostridia    | Eubacteriales        | Oscillospiraceae      | <i>Fournierella</i>                               | 2   |
| Bacteria | Bacillota    | Clostridia    | Eubacteriales        | Oscillospiraceae      | <i>Negativibacillus</i>                           | 3   |
| Bacteria | Bacillota    | Clostridia    | Eubacteriales        | Oscillospiraceae      | <i>Phoceia</i>                                    | 2   |
| Bacteria | Bacillota    | Clostridia    | Eubacteriales        | Oscillospiraceae      | <i>Ruminococcaceae_ge</i>                         | 94  |
| Bacteria | Bacillota    | Clostridia    | Eubacteriales        | Oscillospiraceae      | <i>Ruminococcus</i>                               | 122 |
| Bacteria | Bacillota    | Clostridia    | Eubacteriales        | Oscillospiraceae      | <i>Subdoligranulum</i>                            | 384 |
| Bacteria | Bacillota    | Clostridia    | Eubacteriales        | Oscillospiraceae      | UBA1819                                           | 30  |
| Bacteria | Bacillota    | Clostridia    | Eubacteriales        | UCG-010               | UCG-010_ge                                        | 37  |
| Bacteria | Bacillota    | Clostridia    | Eubacteriales        | Peptococcaceae        | <i>Peptococcaceae_ge</i>                          | 3   |
| Bacteria | Bacillota    | Clostridia    | Peptostreptococcales | Anaerovoracaceae      | <i>Anaerovoracaceae_Family_XIII_AD3_011_group</i> | 3   |
| Bacteria | Bacillota    | Clostridia    | Peptostreptococcales | Anaerovoracaceae      | <i>Anaerovoracaceae_Family_XIII_UCG-001</i>       | 3   |
| Bacteria | Bacillota    | Clostridia    | Peptostreptococcales | Anaerovoracaceae      | <i>Anaerovoracaceae_ge</i>                        | 1   |
| Bacteria | Bacillota    | Clostridia    | Eubacteriales        | Peptostreptococcaceae | <i>Romboutsia</i>                                 | 1   |
| Bacteria | Bacillota    | Tissierellia  | Tissierellales       | Peptoniphilaceae      | <i>Anaerococcus</i>                               | 1   |
| Bacteria | Bacillota    | Tissierellia  | Tissierellales       | Peptoniphilaceae      | <i>Ezakiella</i>                                  | 1   |
| Bacteria | Bacillota    | Clostridia    | Eubacteriales        | Eubacteriales_fa      | <i>Fenollaria</i>                                 | 2   |
| Bacteria | Bacillota    | Tissierellia  | Tissierellales       | Peptoniphilaceae      | <i>Peptoniphilus</i>                              | 7   |
| Bacteria | Bacillota    | Bacillota_cl  | Bacillota_or         | Bacillota_fa          | <i>Bacillota_ge</i>                               | 4   |
| Bacteria | Bacillota    | Negativicutes | Acidaminococcales    | Acidaminococcaceae    | <i>Phascolarctobacterium</i>                      | 42  |
| Bacteria | Bacillota    | Negativicutes | Veillonellales       | Veillonellaceae       | <i>Dialister</i>                                  | 2   |
| Bacteria | Bacillota    | Negativicutes | Veillonellales       | Veillonellaceae       | <i>Veillonella</i>                                | 1   |
| Bacteria | Bacteria_ph  | Bacteria_cl   | Bacteria_or          | Bacteria_fa           | <i>Bacteria_ge</i>                                | 10  |
| Bacteria | Bacteroidota | Bacteroidia   | Bacteroidales        | Bacteroidaceae        | <i>Bacteroides</i>                                | 621 |
| Bacteria | Bacteroidota | Bacteroidia   | Bacteroidales        | Bacteroidales_fa      | <i>Bacteroidales_ge</i>                           | 8   |
| Bacteria | Bacteroidota | Bacteroidia   | Bacteroidales        | Barnesiellaceae       | <i>Barnesiella</i>                                | 2   |
| Bacteria | Bacteroidota | Bacteroidia   | Bacteroidales        | Barnesiellaceae       | <i>Copro bacter</i>                               | 9   |
| Bacteria | Bacteroidota | Bacteroidia   | Bacteroidales        | Odoribacteraceae      | <i>Butyricimonas</i>                              | 2   |
| Bacteria | Bacteroidota | Bacteroidia   | Bacteroidales        | Odoribacteraceae      | <i>Odoribacter</i>                                | 6   |

|          |                                   |                               |                                   |                                    |                                    |      |
|----------|-----------------------------------|-------------------------------|-----------------------------------|------------------------------------|------------------------------------|------|
| Bacteria | Bacteroidota                      | Bacteroidia                   | Bacteroidales                     | Porphyromonadaceae                 | <i>Sanguibacteroides</i>           | 1    |
| Bacteria | Bacteroidota                      | Bacteroidia                   | Bacteroidales                     | Porphyromonadaceae                 | <i>Porphyromonas</i>               | 7    |
| Bacteria | Bacteroidota                      | Bacteroidia                   | Bacteroidales                     | Prevotellaceae                     | <i>Paraprevotella</i>              | 10   |
| Bacteria | Bacteroidota                      | Bacteroidia                   | Bacteroidales                     | Prevotellaceae                     | <i>Prevotella</i>                  | 16   |
| Bacteria | Bacteroidota                      | Bacteroidia                   | Bacteroidales                     | Prevotellaceae                     | <i>Prevotellaceae_ge</i>           | 2    |
| Bacteria | Bacteroidota                      | Bacteroidia                   | Bacteroidales                     | Prevotellaceae                     | <i>Prevotellaceae_NK3B31_group</i> | 149  |
| Bacteria | Bacteroidota                      | Bacteroidia                   | Bacteroidales                     | Prevotellaceae                     | <i>Prevotellaceae_UCG-001</i>      | 18   |
| Bacteria | Bacteroidota                      | Bacteroidia                   | Bacteroidales                     | Rikenellaceae                      | <i>Alistipes</i>                   | 128  |
| Bacteria | Bacteroidota                      | Bacteroidia                   | Bacteroidales                     | Rikenellaceae                      | <i>Rikenellaceae_RC9_gut_group</i> | 24   |
| Bacteria | Bacteroidota                      | Bacteroidia                   | Bacteroidales                     | Tannerellaceae                     | <i>Parabacteroides</i>             | 46   |
| Bacteria | Bacteroidota                      | Bacteroidia                   | Bacteroidia_or                    | Bacteroidia_fa                     | <i>Bacteroidia_ge</i>              | 3    |
| Bacteria | Cyanobacteriota<br>/Melainacteria | Candidatus<br>Melainabacteria | Candidatus<br>Gastranaerophilales | Candidatus<br>Gastranaerophilaceae | <i>Gastranaerophilales_ge</i>      | 2    |
| Bacteria | Elusimicrobiota                   | Elusimicrobia                 | Elusimicrobiales                  | Elusimicrobiaceae                  | <i>Elusimicrobium</i>              | 2    |
| Bacteria | Fusobacteriota                    | Fusobacteriia                 | Fusobacteriales                   | Fusobacteriaceae                   | <i>Fusobacterium</i>               | 1    |
| Bacteria | Lentisphaerota                    | Lentisphaeria                 | Victivallales                     | Victivallaceae                     | <i>Victivallis</i>                 | 1    |
| Bacteria | Pseudomonadota                    | Betaproteobacteria            | Burkholderiales                   | Oxalobacteraceae                   | <i>Oxalobacter</i>                 | 1    |
| Bacteria | Pseudomonadota                    | Betaproteobacteria            | Burkholderiales                   | Sutterellaceae                     | <i>Parasutterella</i>              | 5    |
| Bacteria | Pseudomonadota                    | Betaproteobacteria            | Burkholderiales                   | Sutterellaceae                     | <i>Sutterella</i>                  | 10   |
| Bacteria | Pseudomonadota                    | Gammaproteobacteria           | Enterobacterales                  | Enterobacterales_fa                | <i>Enterobacterales_ge</i>         | 1    |
| Bacteria | Pseudomonadota                    | Gammaproteobacteria           | Enterobacterales                  | Enterobacteriaceae                 | <i>Escherichia-Shigella</i>        | 6    |
| Bacteria | Pseudomonadota                    | Alphaproteobacteria           | Hyphomicrobiales                  | Hyphomicrobiales_fa                | <i>Enhydrobacter</i>               | 1    |
| Bacteria | Thermodesulfobacteriota           | Desulfovibrionia              | Desulfovibrionales                | Desulfovibrionaceae                | <i>Bilophila</i>                   | 4    |
| Bacteria | Thermodesulfobacteriota           | Desulfovibrionia              | Desulfovibrionales                | Desulfovibrionaceae                | <i>Desulfovibrionaceae_ge</i>      | 33   |
| Bacteria | Verrucomicrobiota                 | Verrucomicrobiae              | Verrucomicrobiales                | Akkermansiaceae                    | <i>Akkermansia</i>                 | 5682 |

**Supplementary Figure S1.** Phylum level frequency analysis for the inocula used to perform the M-batch experiments

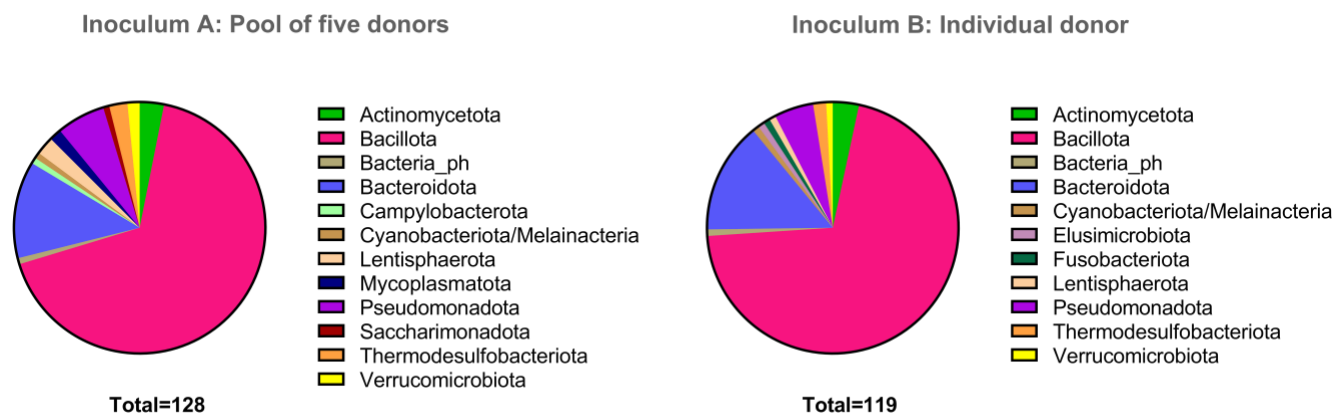

Supplement: s1 [file s1]
